# Supplementary material for: Reagent-free total protein quantification of intact extracellular vesicles by attenuated total reflection Fourier transform infrared (ATR-FTIR) spectroscopy
Source: PubMed Central journal article supplement (PMC7329771; doi:10.1007/s00216-020-02711-8), 2020-05-29
Supplement: 216_2020_2711_MOESM1_ESM.pdf [file 216_2020_2711_MOESM1_ESM.pdf]

## **Analytical and Bioanalytical Chemistry**

### **Electronic Supplementary Material**

# **Reagent-free total protein quantification of intact extracellular vesicles by attenuated total reflection Fourier transform infrared (ATR-FTIR) spectroscopy**

Veronika Szentirmai, András Wacha, Csaba Németh, Diána Kitka, Anita Rác,  
Károly Héberger, Judith Mihály, Zoltán Varga

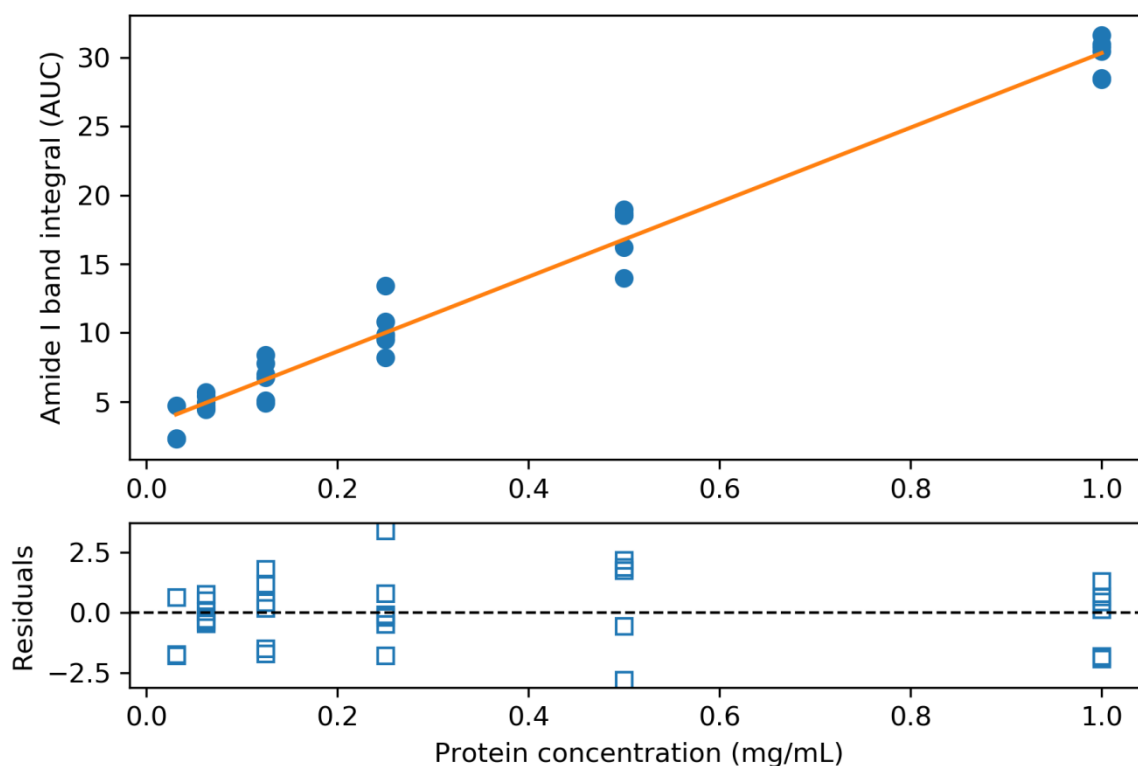

**Fig. S1** Protein standard plot with the fitting residuals. The result of the F-test are listed below

Weighted residual sum of squares :  $SS(w)r = 36.4696$   
 Weighted sum of squares for pure error:  $SS(w)e = 33.0000$   
 Sum of squares due to lack of fit :  $SS(w)r - SS(w)e = 3.4696$   
 Mean squares due to pure error :  $MS(w)e = 1.1000$   
 Mean squares due to lack of fit :  $MS(w)lof = 0.8674$   
 Number of points in x :  $n = 6$   
 Number of independent measurements :  $p = 6$   
 F statistics :  $MS(w)lof / MS(w)e = 0.7886$   
 F( $n-2=4$ ,  $n(p-1)=30$ ) 95% percentile : 2.6896  
 Fit results:  
 slope:  $(27.1 \pm 0.5)$  AUC/(mg/mL)  
 intercept:  $(3.2 \pm 0.2)$  AUC

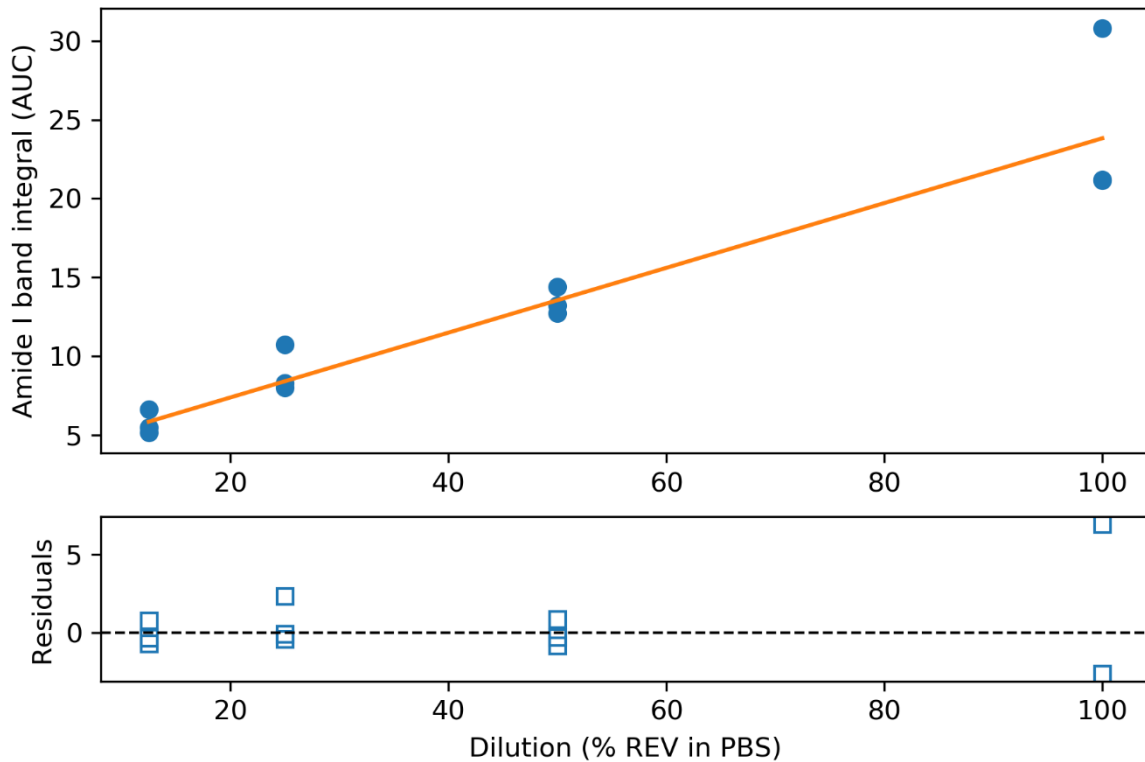

**Fig. S2** Amide I AUC plot vs. red blood cell derived extracellular vesicle (REV) dilution test (presented as %REV in PBS). The result of the F-test are listed below

Weighted residual sum of squares :  $SS(w)r = 12.8773$   
 Weighted sum of squares for pure error:  $SS(w)e = 12.0000$   
 Sum of squares due to lack of fit :  $SS(w)r - SS(w)e = 0.8773$   
 Mean squares due to pure error :  $MS(w)e = 1.5000$   
 Mean squares due to lack of fit :  $MS(w)lof = 0.4386$   
 Number of points in x :  $n = 4$   
 Number of independent measurements :  $p = 3$   
 F statistics :  $MS(w)lof / MS(w)e = 0.2924$   
 F( $n-2=2$ ,  $n(p-1)=8$ ) 95% percentile : 4.4590  
 Fit results:  
 slope:  $(0.21 \pm 0.01)$  AUC/(% REV in PBS)  
 intercept:  $(3.3 \pm 0.5)$  AUC

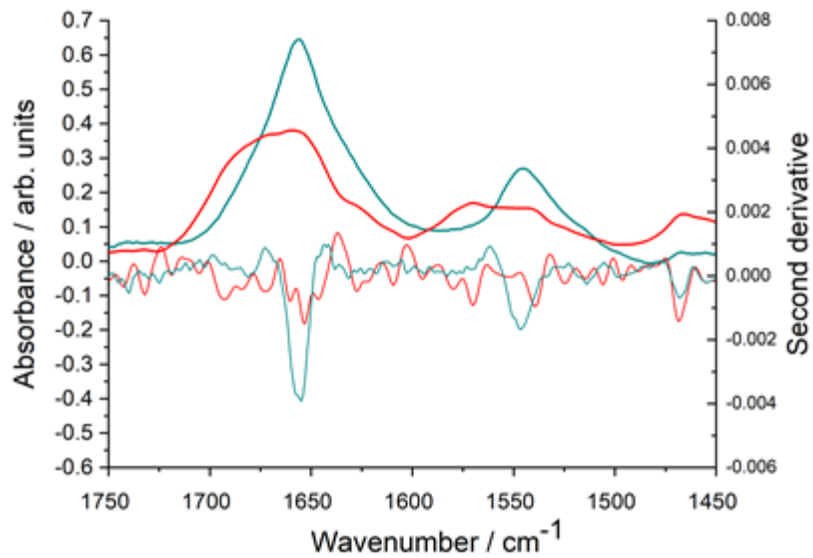

**Fig. S3** Amide I and amide II spectral region of intact REV sample (green line) and after disassembling by ethanol abs. (red line). For better visualization of changes in secondary structure, the second derivative spectra are also included: while the intact REV sample contains proteins mainly with helical structure (thinner green line), after treatment with ethanol high amount of  $\beta$ -sheets, turns and disordered motifs of aggregated and/or denatured proteins appear (thinner red line)
